# Supplementary material for: Weakened lattice-strain effect in MoOx@NPC-supported ruthenium dots toward high-efficiency hydrogen generation
Source: Royal Society of Chemistry journal article supplement (doi:10.1039/d1ta07558f), 2021-01-01
Supplement: d1ta07558f1.pdf [file d1ta07558f1.pdf]

## **Weakened Lattice-Strain Effect in MoO<sub>x</sub>@NPC-Supported Ruthenium Dots toward High-Efficiency Hydrogen Generation**

Min Song,<sup>a#</sup> Haeseong Jang,<sup>b#</sup> Chuang Li,<sup>a#</sup> Min Gyu Kim,<sup>d</sup> Xuqiang Ji,<sup>a,c\*</sup> Xien Liu,<sup>a\*</sup>  
and Jaephil Cho<sup>b\*</sup>

a. College of Chemical Engineering, Qingdao University of Science and Technology, Qingdao 266042, China

b. Department of Energy Engineering, School of Energy and Chemical Engineering, Ulsan National Institute of Science and Technology (UNIST), Ulsan 689-798, South Korea

c. College of Materials Science and Engineering, Qingdao University, Qingdao 266071, China

d. Beamline Research Division, Pohang Accelerator Laboratory (PAL), Pohang 790-784, Korea

# These authors contributed equally to this work.

\* Corresponding authors (emails: xuqianglucky@163.com (X. Ji); liuxien@qust.edu.cn (X. Liu); jpcho@unist.ac.kr (J. Cho))

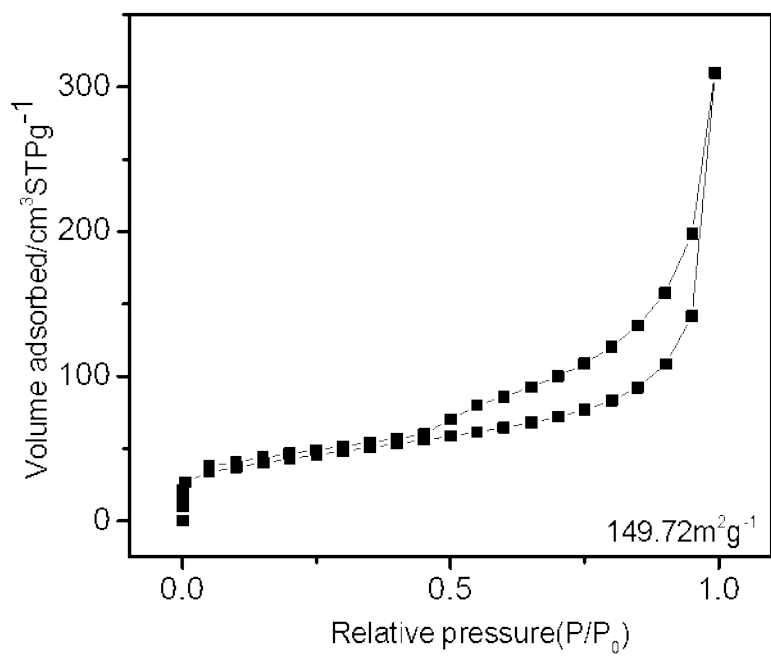

**Fig. S1** N<sub>2</sub> adsorption-desorption isotherm plots for Ru-MoO<sub>x</sub>/NPC.

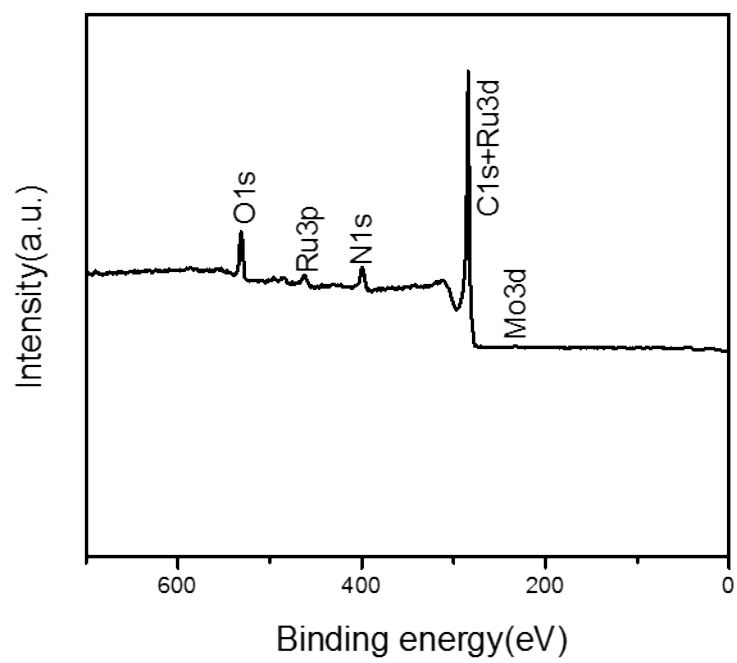

**Fig. S2** High-resolution XPS spectra of survey for Ru-MoO<sub>x</sub>/NPC.

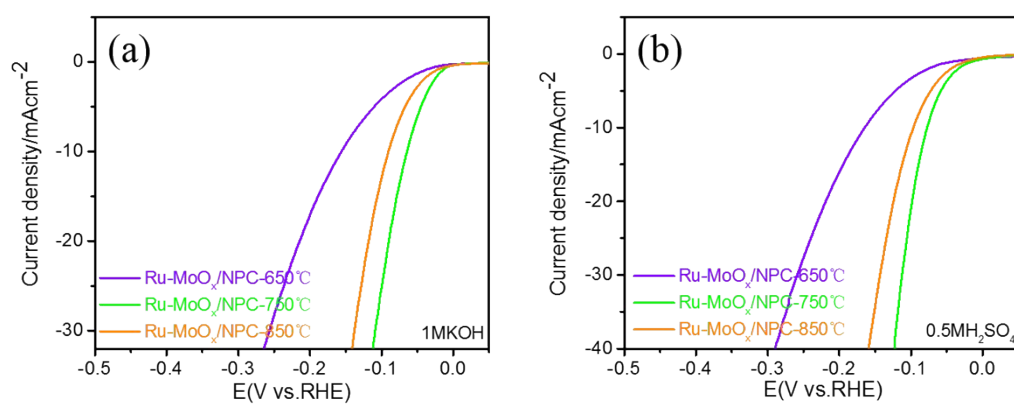

**Fig. S3** Polarization curves of Ru-MoO<sub>x</sub>/NPC-650°C, Ru-MoO<sub>x</sub>/NPC-750°C, Ru-MoO<sub>x</sub>/NPC-850°C in 1 M KOH(a) and 0.5 M H<sub>2</sub>SO<sub>4</sub> (b).

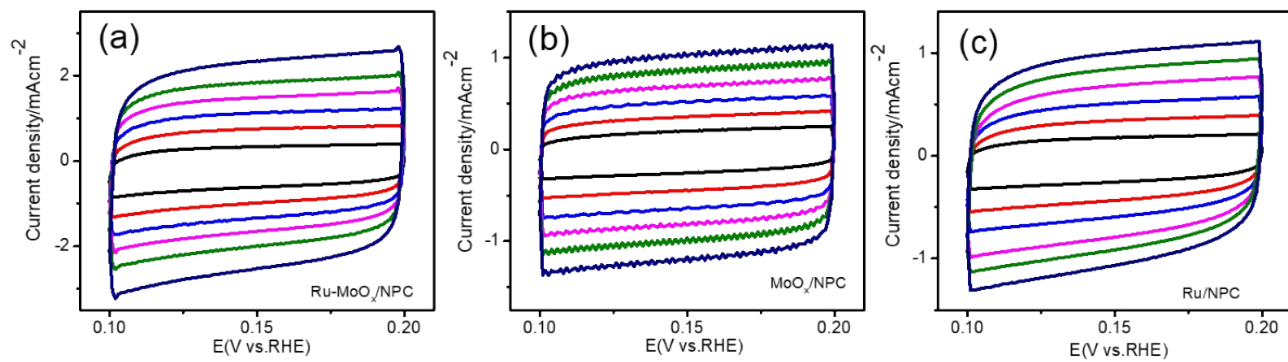

**Fig. S4** Cyclic voltammograms curves of Ru-MoO<sub>x</sub>/NPC (a), MoO<sub>x</sub>/NPC (b) and Ru/NPC (c) at different sweeping rates from 20 mV s<sup>-1</sup> to 100 mV s<sup>-1</sup> at a potential ranging from 0.1 V to 0.2 V in 1 M KOH.

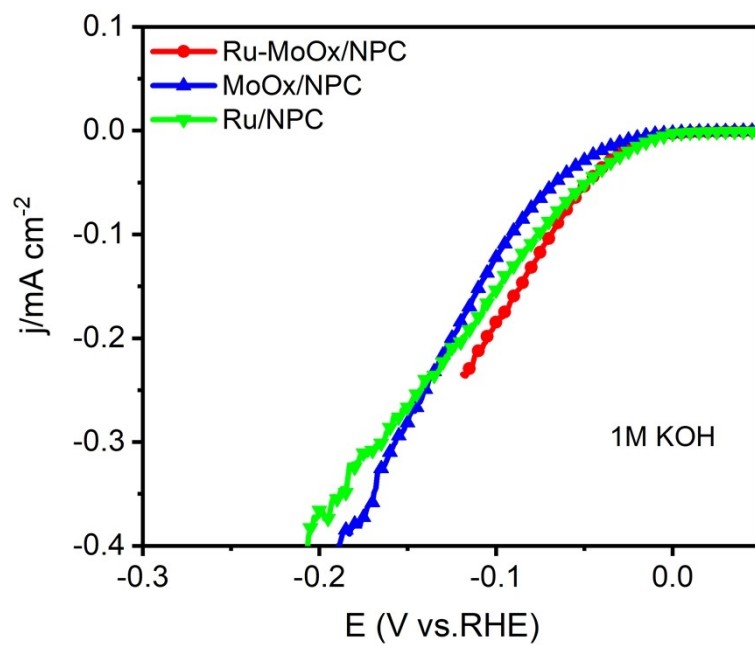

**Fig. S5** LSV curves normalized by ECSA for Ru-MoO<sub>x</sub>/NPC, MoO<sub>x</sub>/NPC and Ru/NPC in 1M KOH.

**Table S1** HER activity of Ru-MoO<sub>x</sub>/NPC and the catalyst reported in literature in 1 M KOH

| <b>Electrocatalyst</b>        | <b>Overpotential (mV)<br/>@10mAcm<sup>-2</sup></b> | <b>Tafel Slope<br/>(mVdec<sup>-1</sup>)</b> | <b>Ref</b>       |
|-------------------------------|----------------------------------------------------|---------------------------------------------|------------------|
| <b>Ru-MoO<sub>x</sub>/NPC</b> | <b>37</b>                                          | <b>37.1</b>                                 | <b>This work</b> |
| Mo <sub>2</sub> C/N-PC        | 100                                                | 94.5                                        | 1                |
| Ru-NiFe-P                     | 44                                                 | 80                                          | 2                |
| Ru/C                          | 53                                                 | 36.2                                        | 3                |
| NiO/Ru@Ni                     | 39                                                 | 75                                          | 4                |
| Ru/RuO <sub>2</sub>           | 137                                                | 112                                         | 5                |
| Ni@Ni <sub>2</sub> P-Ru       | 31                                                 | 41                                          | 6                |
| Ru@CN                         | 32                                                 | 53                                          | 7                |
| Pd <sub>3</sub> Ru            | 42                                                 | /                                           | 8                |
| SA-Ru-MoS <sub>2</sub>        | 76                                                 | 21                                          | 9                |
| Ru/Ni <sub>2</sub> P          | 132                                                | 124                                         | 10               |

**Table S2** HER activity of Ru-MoO<sub>x</sub>/NPC and the catalyst reported in literature in 0.5 M H<sub>2</sub>SO<sub>4</sub>

| Electrocatalyst                                                  | Overpotential (mV)<br>@10mAcm <sup>-2</sup> | Tafel Slope<br>(mVdec <sup>-1</sup> ) | Ref              |
|------------------------------------------------------------------|---------------------------------------------|---------------------------------------|------------------|
| <b>Ru-MoO<sub>x</sub>/NPC</b>                                    | <b>27</b>                                   | <b>43</b>                             | <b>This work</b> |
| Ru-Ru <sub>2</sub> P@NPC                                         | 42                                          | 39.75                                 | 11               |
| Ni@Ni <sub>2</sub> P-Ru                                          | 51                                          | 35                                    | 6                |
| Ru@CN                                                            | 126                                         | /                                     | 7                |
| Pd@Ru                                                            | 37                                          | 30                                    | 12               |
| Ru/Ni <sub>2</sub> P                                             | 89                                          | 62                                    | 10               |
| rGO-MoO <sub>3-x</sub> -MoRu                                     | 60                                          | 40                                    | 13               |
| 3D-NiCoP                                                         | 80                                          | 37                                    | 14               |
| FLNPC@MoP - N<br>C/MoP - C/CC                                    | 74                                          | 50                                    | 15               |
| CoPS                                                             | 48                                          | 56                                    | 16               |
| Ni <sub>0.89</sub> Co <sub>0.11</sub> Se <sub>2</sub><br>MNSN/NF | 52                                          | 39                                    | 17               |

## References

1. W. Han, L. Chen, B. Ma, J. Wang, W. Song, X. Fan, Y. Li, F. Zhang and W. Peng, *J. Mater. Chem. A*, 2019, **7**, 4734-4743.
2. M. Qu, Y. Jiang, M. Yang, S. Liu, Q. Guo, W. Shen, M. Li and R. He, *Appl. Catal. B*, 2020, **263**, 118324.
3. Y. Li, J. Abbott, Y. Sun, J. Sun, Y. Du, X. Han, G. Wu and P. Xu, *Appl. Catal. B*, 2019, **258**, 117952.
4. C. Zhong, Q. Zhou, S. Li, L. Cao, J. Li, Z. Shen, H. Ma, J. Liu, M. Lu and H. Zhang, *J. Mater. Chem. A*, 2019, **7**, 2344-2350.
5. R. Jiang, D. T. Tran, J. Li and D. Chu, *Energy Environ. Sci.*, 2019, **2**, 201-208.
6. Y. Liu, S. Liu, Y. Wang, Q. Zhang, L. Gu, S. Zhao, D. Xu, Y. Li, J. Bao and Z. Dai, *J. Am. Chem. Soc.*, 2018, **140**, 2731-2734.
7. J. Wang, Z. Wei, S. Mao, H. Li and Y. Wang, *Energy Environ. Sci.*, 2018, **11**, 800-806.
8. X. Qin, L. Zhang, G.-L. Xu, S. Zhu, Q. Wang, M. Gu, X. Zhang, C. Sun, P. B. Balbuena and K. Amine,



- ACS Catal.*, 2019, **9**, 9614-9621.
9. J. Zhang, X. Xu, L. Yang, D. Cheng and D. Cao, *Small Methods*, 2019, **3**, 1900653.
  10. J.-Q. Chi, X.-Y. Zhang, X. Ma, B. Dong, J.-Q. Zhang, B.-Y. Guo, M. Yang, L. Wang, Y.-M. Chai and C. Liu, *ACS Sustainable Chem. Eng.*, 2019, **7**, 17714-17722.
  11. J. Yu, G. Li, H. Liu, L. Zhao, A. Wang, Z. Liu, H. Li, H. Liu, Y. Hu and W. Zhou, *Adv. Funct. Mater.*, 2019, 1901154.
  12. Y. Luo, X. Luo, G. Wu, Z. Li, G. Wang, B. Jiang, Y. Hu, T. Chao, H. Ju and J. Zhu, *ACS Appl. Mater. Interfaces*, 2018, **10**, 34147-34152.
  13. S. Liu, C. Chen, Y. Zhang, Q. Zheng, S. Zhang, X. Mu, C. Chen, J.-M. Ma and S. Mu, *J. Mater. Chem. A*, 2019.
  14. B. Ma, Z. Yang, Y. Chen and Z. Yuan, *Nano Res.*, 2019, **12**, 375-380.
  15. B. Liu, H. Li, B. Cao, J. Jiang, R. Gao and J. Zhang, *Advanced Functional Materials*, 2018, **28**, 1801527.
  16. M. Cabán-Acevedo, M. L. Stone, J. Schmidt, J. G. Thomas, Q. Ding, H.-C. Chang, M.-L. Tsai, J.-H. He and S. Jin, *Nat. Mater.*, 2015, **14**, 1245.
  17. B. Liu, Y. F. Zhao, H. Q. Peng, Z. Y. Zhang, C. K. Sit, M. F. Yuen, T. R. Zhang, C. S. Lee and W. J. Zhang, *Adv. Mater.*, 2017, **29**, 1606521.
